# Supplementary material for: The first anionic four-connected boron imidazolate framework
Source: Royal Society of Chemistry journal article supplement (doi:10.1039/b925714d), 2010-01-01
Supplement: b925714d.pdf [file b925714d.pdf]

## Supporting Information

### The First Anionic Four-Connected Boron Imidazolate Framework

Jian Zhang, Shumei Chen and Xianhui Bu \*

*Department of Chemistry and Biochemistry, California State University, Long Beach, 1250 Bellflower Boulevard, Long Beach,  
CA 90840. E-mail: [xbu@csulb.edu](mailto:xbu@csulb.edu)*

**X-ray powder diffraction:** X-ray powder diffraction experiments were performed on a Bruker D8 Advance X-ray powder diffractometer operating at 40kV and 40mA (CuK radiation,  $\lambda = 1.5418\text{\AA}$ ). The data collection was carried out with a step size of 0.03 degree and counting time of 1s per step.

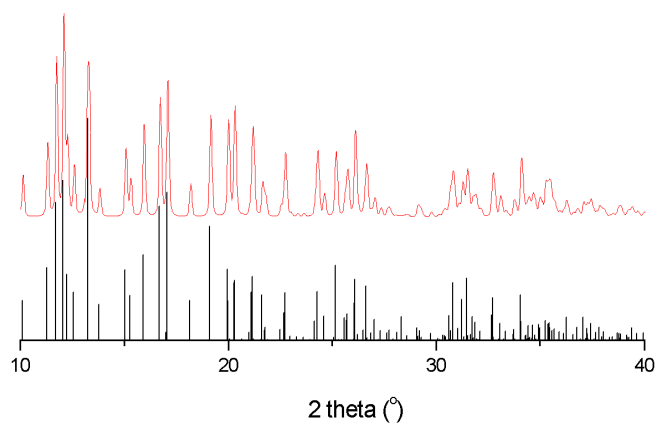

**Figure S1.** PXRD patterns for **1**: (bottom) simulated on the basis of the structure determined by single-crystal X-ray diffraction; (top) experimental pattern recorded at room temperature.
